# Supplementary material
Source: Springer Nature journal article supplement (https://www.springermedizin.de/resource/supplementary/13019_2013_1560_MOESM2_ESM.pdf/9640652)

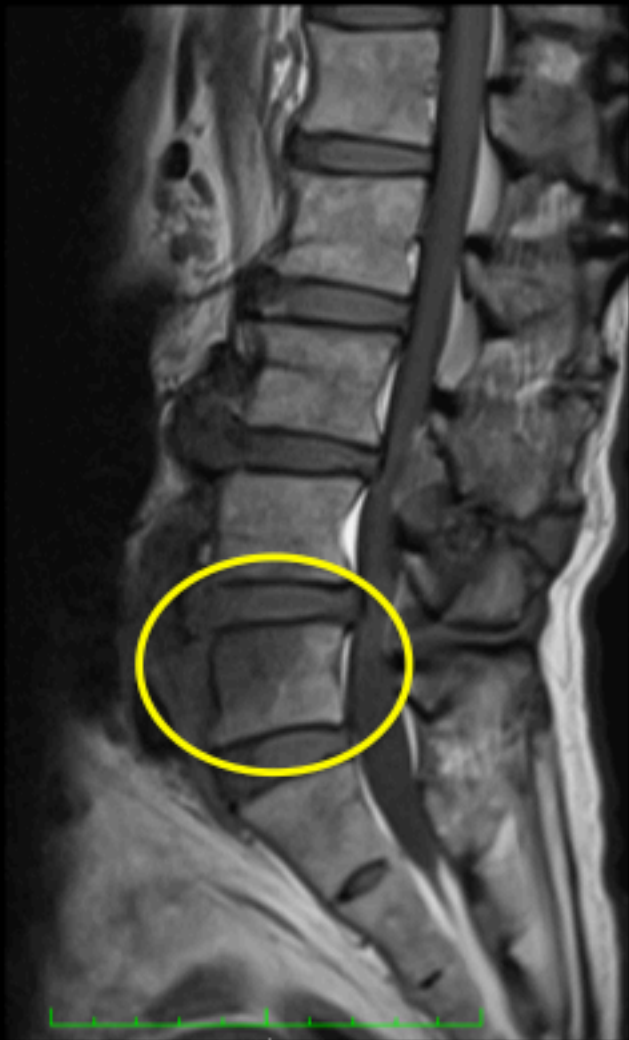

T1WI

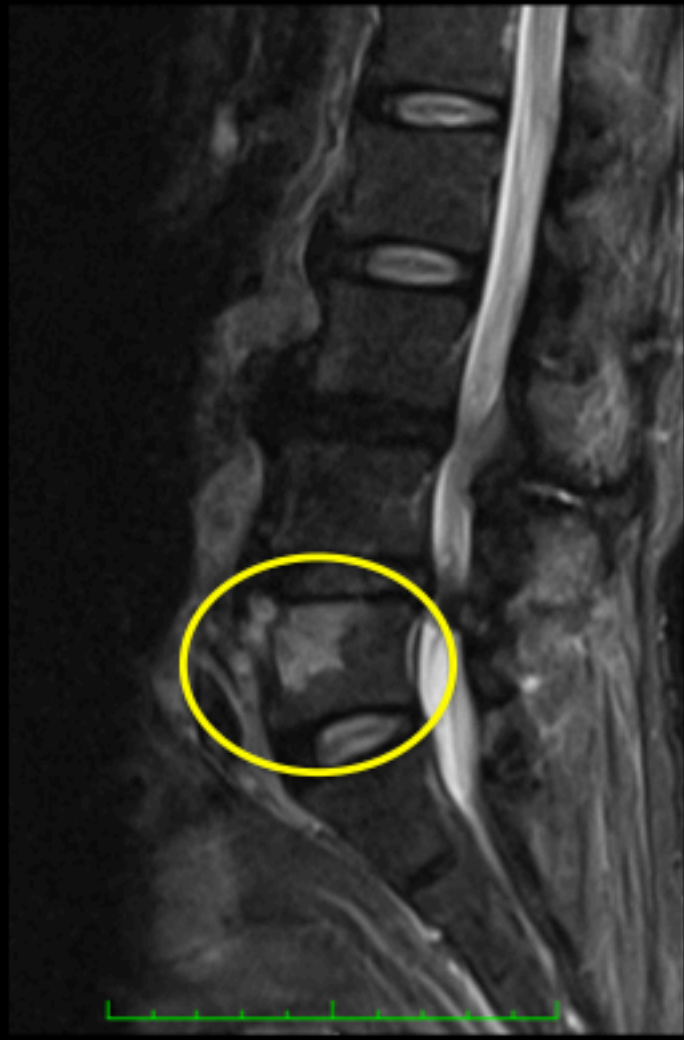

T2WI+FS

Supplement: MOESM2 [file 9640652]
